# Supplementary material
Source: PubMed Central journal article supplement (PMC5462014)
Supplement: supp_pp.16.01816_PP2016-01816R2_Figure_S1.pdf [file supp_pp.16.01816_PP2016-01816R2_Figure_S1.pdf]

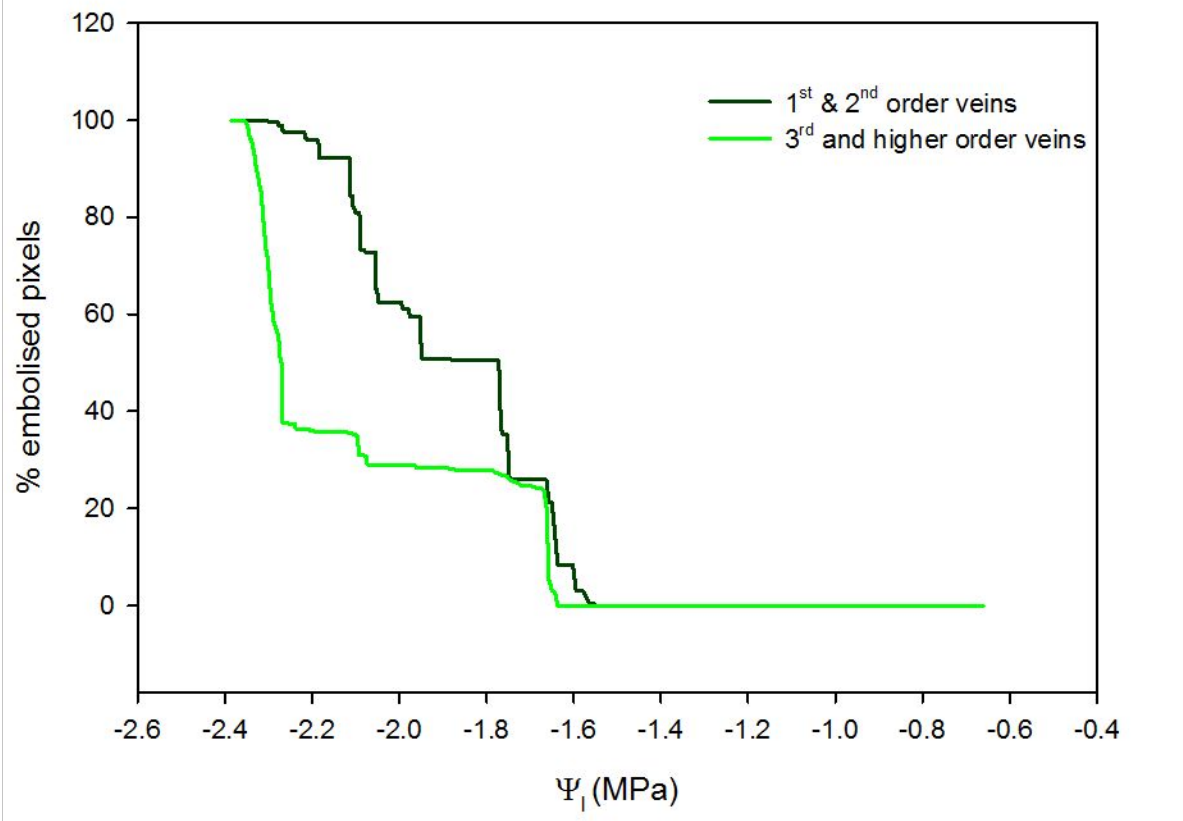

Figure S1. The percent of embolised pixels in 1<sup>st</sup> and 2<sup>nd</sup> order veins (black) or 3<sup>rd</sup> and higher order veins (green) as a function of the leaf water potential ( $\Psi_l$ ).
